# Supplementary material for: Change characteristics and influencing factors of grassland degradation in adjacent areas of the Qinghai–Tibet Plateau and suggestions for grassland restoration
Source: PeerJ. 2023 Sep 12;11:e16084. doi: 10.7717/peerj.16084 (PMC10503501; doi:10.7717/peerj.16084)
Supplement: Supplemental Information 2 [file peerj-11-16084-s002.xlsx]

## Sheet: land area
		Cultivated land	Forest	Grassland	Water area	Urban and rural residential land	Unutilized land	Tatal area
Maqu County	1980	0.685	844.074	7796.12	186.143	4.69	1870.22	10701.9
	1990	0.695	862.113	7793.97	172.821	4.69	1867.65	10701.9
	2000	2.1	855.098	7805.95	163.279	6.074	1869.44	10701.9
	2010	1.58	855.624	7813.45	199.958	12.555	1818.79	10702
	2018	1.585	856.714	7837.28	175.881	16.483	1790.38	10678.3
Xiahe County	1980	268.49	2137.58	4399.52	8.223	28.262	122.025	6964.1
	1990	269.057	2137.87	4398.63	8.235	28.271	122.021	6964.08
	2000	338.163	2045.11	4421.12	8.299	30.499	120.979	6964.18
	2010	332.542	2050.28	4389.81	8.199	35.739	147.581	6964.15
	2018	330.107	2055.93	4402.46	8.131	39.073	123.745	6959.44
Luqu County	1980	14.003	1061.16	3489.63	21.098	6.229	233.579	4825.71
	1990	14.003	1060.42	3489.98	21.103	6.229	233.965	4825.7
	2000	27.568	1047.37	3489.51	18.726	7.688	234.837	4825.71
	2010	38.114	1069.01	3420.08	35.024	12.343	251.229	4825.8
	2018	28.692	1070	3446.4	34.666	15.539	221.449	4816.75

## Sheet: glass area
	Maqu County				Xiahe County				Luqu County
	High coverage grassland	Medium coverage grassland	Slight coverage grassland	Total grassland	High coverage grassland	Medium coverage grassland	Slight coverage grassland	Total grassland	High coverage grassland	Medium coverage grassland	Slight coverage grassland	Total grassland
1980	1955.13	4643.53	1197.46	7796.12	2524.1	1795.36	79.988	4399.44	2811.68	677.958	0	3489.63
1990	1951.08	4647.64	1195.26	7793.97	2522.73	1796.04	79.812	4398.58	2811.56	678.42	0	3489.98
2000	1893.22	4481.51	1431.23	7805.95	2589.12	1750.35	81.662	4421.12	2813.51	676.006	0	3489.51
2010	1898.1	4468.17	1447.18	7813.45	2587.01	1745.36	57.44	4389.81	2752.18	667.543	0.356	3420.08
2018	1917.09	4472.18	1448.02	7837.28	2577.57	1740.63	84.252	4402.46	2771.5	674.68	0.224	3446.4

## Sheet: NPP
	Maqu County			Xiahe County			Luqu County					ANPP				HNPP				PNPP
	ANPP	PNPP	HNPP	ANPP	PNPP	HNPP	ANPP	PNPP	HNPP		Year	Maqu County	Xiahe County	Luqu County		Maqu County	Xiahe County	Luqu County		Maqu County	Xiahe County	Luqu County
1980		852.022			623.825			733.89			1980					852.02	623.82	733.89
1986	174.551	972.387	797.836	137.77	751.591	613.821	137.12	879.224	742.104		1986	174.551	137.77	137.12		972.39	751.59	879.22		797.836	613.82	742.1
1990	182.244	752.716	570.473	141.513	894.406	752.893	142.118	958.884	816.766		1990	182.244	141.51	142.12		752.72	894.41	958.88		570.473	752.89	816.77
1995	137.344	921.251	783.907	139.595	831.588	691.993	138.109	834.725	696.617		1995	137.344	139.6	138.11		921.25	831.59	834.73		783.907	691.99	696.62
2000	124.794	932.494	807.7	141.152	718.533	577.381	138.028	734.022	595.994		2000	124.794	141.15	138.03		832.49	718.53	734.02		807.7	577.38	595.99
2005	137.341	915.944	778.603	134.317	955.536	821.219	129.999	1125.05	995.054		2005	137.341	134.32	130		1015.94	955.54	1125.05		778.603	821.22	995.05
2010	93.0039	884.482	791.478	136.343	833.68	697.337	133.545	893.203	759.657		2010	93.0039	136.34	133.55		884.48	833.68	893.2		791.478	697.34	759.66
2015	96.7304	812.837	716.107	138.388	731.485	593.097	136.721	731.167	594.446		2015	96.7304	138.39	136.72		812.84	731.48	731.17		716.107	593.1	594.45
2017		1022.68		136.093	852.516	716.423	135.344	852.05	716.706		2017		136.09	135.34		1022.68	852.52	852.05			716.42	716.71
												0.445832

## Sheet: RUE
RUE
Year	Maqu County	Xiahe County	Luqu County
1982	0.697047	0.780884	0.78113
1983	0.695957	0.879944	0.753345
1984	0.626428	0.65269	0.636309
1985	0.655364	0.80076	0.788693
1986	0.658978	0.969891	0.856469
1987	0.75214	0.821754	0.778574
1988	0.756381	0.83917	0.879697
1989	0.541365	0.790734	0.710928
1990	0.888775	0.804685	0.778092
1991	0.676947	1.07762	1.0792
1992	0.644868	0.701052	0.773727
1993	0.897719	0.94197	0.991774
1994	0.776578	0.794517	0.769232
1995	0.686378	0.799612	0.852165
1996	0.924998	0.796382	0.760631
1997	0.758122	0.854131	0.762172
1998	0.331141	0.791043	0.777854
1999	0.75788	0.804424	0.874223
2000	1.11091	1.49236	1.39912
2001	1.07808	1.28234	1.13342
2002	1.16891	1.4694	1.30489
2003	0.740658	0.866664	0.740171
2004	0.924502	1.18134	0.881004
2005	0.704868	0.856759	0.641865
2006	0.943762	0.95318	0.832865
2007	0.85726	1.02775	0.822829
2008	1.12559	1.15679	1.05744
2009	0.77421	1.33684	1.01586
2010	0.945289	1.12957	0.943703
2011	0.87619	1.02329	1.00902
2012	0.647822	0.797566	0.7649
2013	1.10701	1.08729	1.06798
2014	0.898966	0.904859	0.894475
2015	1.11868	1.31583	1.28367
2016	0.86843	0.937041	0.95676
2017	0.861534	1.10061	1.13395

## Sheet: temperature
Annual average temperature (℃)
Year	Maqu County	Xiahe County	Luqu County
1980	4.6	2.3	2.4
1981	5.2	2.6	2.7
1982	4.9	2.1	1.9
1983	4.8	1.7	2
1984	4.9	1.9	2.4
1985	4.8	2.1	2
1986	4.7	2	1.9
1987	4.9	2.8	2.5
1988	5.2	2.7	2.6
1989	5.2	2.5	2.4
1990	4.7	2.8	2.6
1991	5.1	2.7	2.5
1992	4.8	2.2	1.8
1993	5	2.4	2.2
1994	5.1	3	2.5
1995	5.1	2.4	2.2
1996	4.9	2.4	2.1
1997	4.8	2.7	2.1
1998	5.2	3.9	3.6
1999	5.2	3.5	3.1
2000	4.9	2.9	2.7
2001	5.1	3.2	3
2002	4.8	3.3	3.1
2003	5.2	3.4	3.4
2004	4.7	2.9	2.8
2005	5.5	3.2	3.1
2006	5.6	3.7	3.6
2007	5.5	3.2	3.2
2008	5.2	2.9	3.1
2009	5.6	3.6	4
2010	5.4	3.8	4.2
2011	5.2	3.1	2.63
2012	5.3	3	2.5
2013	5	3.5	3.08
2014	5.2	3.4	4.25
2015	4.8	3.6	2.88
2016	4.92	3.96	2.96
2017	5.3	3.5	2.71
2018	5.56	3.44	2.88

## Sheet: precipitation
Annual average precipitation (mm)
Year	Maqu County	Xiahe County	Luqu County
1980	537.3	374	450
1981	809.7	567.3	660
1982	530.1	493.2	540
1983	609.4	502.5	650
1984	635.3	655.1	740
1985	601.7	567	600
1986	635.1	462.9	560
1987	523.4	514.3	575
1988	563.3	539	545
1989	698.7	512.9	610
1990	462.8	571.7	625
1991	595.5	421.5	450
1992	638.3	611.2	600
1993	466.5	465.6	470
1994	563.9	569.4	625
1995	592.2	522.5	525
1996	448.4	561.5	620
1997	547.2	525.2	625
1998	663.2	565.2	610
1999	639	547.6	540
2000	522.1	438.9	450
2001	619.7	530	610
2002	502.6	406.8	455
2003	731.4	671.8	775
2004	584.6	500.4	635
2005	672.2	621.8	775
2006	592.7	605.9	655
2007	612.9	538	640
2008	541	552.3	590
2009	632.2	413.1	510
2010	562.4	523.5	570
2011	637.6	582.7	582.7
2012	718.6	639.8	639.8
2013	532.5	548.5	548.5
2014	610.8	651.5	651.5
2015	507.2	447.9	447.9
2016	684.2	623.4	623.4
2017	678.3	538.2	538.2
2018	794.7	550.2	799.8

## Sheet: livestock
	Number of livestock marketing (×104 heads)			Number of livestock stock (×104 heads)			Commoddity rate (%)
Year	Maqu County	Xiahe County	Luqu County	Maqu County	Xiahe County	Luqu County	Maqu County	Xiahe County	Luqu County
1990		22			94.77
1991	25.17				117.87			20.11
1995	10.96	25.19	8.7	60.71	94.6	40.24	13.18	20.4	16.5
2000		21.45	11.57		76.05	42.9		24.37	22.06
2001	17.79			67.39	95.07		23.5
2002	16.25			70.23			23.01
2003	17.22	22.34	10.9	68.78	72.34	41.78	24.71	26.08	24.62
2004	17.02	22.23	11.9	61.15	92.87	41.7	24.95	27.12	25.41
2005	17.53	24.29	12.65	64.74	92.04	42.83	25.1	28.6	27.94
2006	19.96	24.7	13.79	78.18	74.17	46.58	25.01	29.2	27.7
2007	22.28	26.79	15.65	82.11	78.56	51.99	26.07	30.6	27.82
2008	27.88	31.31	15.63	106	101.85	72.99	26	35.64	22.71
2009	27.34	31.11	18.11	106	91.33	72.93	24.6	36.41	23.4
2011	30	39.02	20.12	105.01	90.36	70.23	26.98	43.18	28.85
2012	28.6	41.03	23.39	104.25	86.84	66.27	26.8	41.77	32.4
2013	33.9	42.36	24.47	96.04	85	64.09	32.3	47.09	35.01
2014	34.4	43.71	26.41	102.63	86	61.23	31.61	49.96	39.27
2015	36.75	46.06	26.54	100.1	83.24	58.12	33.89	52	43.58
2016	38.53	45.55	29.53	96.35	83.23	55.83	36.45	54.17	48.58
2017	41.47	49.6	31.37	89.32	80.55	53.11	48.8	60.1	53.83
2018	41.47	79.72	35.7	89.32	102.6	58.51	45.13	76.5	53.46

## Sheet: GDP
	Maqu (104）				Xiahe (104）				Luqu (104）					GDP per capita (¥)
Year	GDP	Primary	Secondary	Tertiary	GDP	Primary	Secondary	Tertiary	GDP	Primary	Secondary	Tertiary			Maqu County	Xiahe County	Luqu County
1980	1510	1211	88	211	2845	2151	224	470	1147	835	87	227		1980	608	255	529
1981	2065	1747	74	244	3009	2267	201	541	1272	998	48	226		1981	828	265	578
1982	1218	893	79	246	3133	2255	284	594	882	580	64	238		1982	481	253	394
1983	1436	1108	45	283	2854	1969	225	660	875	570	38	267		1983	558	233	382
1984	1752	1289	117	346	3323	2212	292	819	1132	726	86	320		1984	669	266	484
1985	2225	1602	112	511	3977	2397	495	1085	1504	970	84	450		1985	830	312	637
1986	3404	2576	231	597	4535	2576	571	1208	1717	1096	82	539		1986	1258	350	723
1987	3565	2816	160	589	6418	4193	837	1388	2334	1445	345	544		1987	1296	493	970
1988	6238	5349	221	668	7457	4764	1106	1587	2493	1635	257	601		1988	2216	566	1030
1989	3907	2804	372	731	8404	5619	1173	1612	3049	2129	229	691		1989	1368	628	1227
1990	4831	3570	416	845	8476	5513	1156	1807	3171	2058	304	809		1990	1646	616	1215
1991	4211	2913	441	857	8874	5438	1534	1902	2868	1729	365	774		1991	1390	637	1094
1992	5664	3936	718	1010	10092	5809	1986	2297	3260	1887	451	922		1992	1842	715	1199
1993	8776	6109	1702	956	12895	7353	3039	2503	4210	2534	741	935		1993	3822	899	1534
1994	9650	5056	3115	1479	17134	10633	3033	3468	5549	3315	801	1433		1994	3068	1187	2033
1995	12046	6196	3784	2066	18451	11960	2933	3558	6106	3575	986	1545		1995	3806	1262	2196
1996	15719	7966	5549	2204	17420	10180	3439	3801	6431	4012	843	1576		1996	4657	1158	2289
1997	17208	7972	6631	2605	22715	13686	4859	4170	7349	4517	1064	1768		1997	4793	1148	2574
1998	19840	7924	7433	2683	16103	9884	2837	3382	7760	4834	1121	1805		1998	5451	2094	2667
1999	21649	10173	8831	2645	17132	10270	2730	4132	8181	5034	1114	2033		1999	5859	2202	2764
2000	23751	10394	9620	3737	18323	10630	1972	5721	9050	5383	790	2877		2000	6411	2654	3042
2001	26095	10125	11131	4839	20384	11000	2477	6907	9993	5597	602	3794		2001	6769	2932	3309
2002	28700	10750	11313	6637	22668	11600	3014	8054	10715	5804	689	4222		2002	7113	2969	3468
2003	32609	10818	15402	6389	24373	12108	3599	8666	11639	5857	670	5112		2003	8022	3200	3730
2004	37201	11401	18160	7640	27297	12719	3840	10738	13210	6208	806	6196		2004	9096	3451	4194
2005	42750	12433	20470	9847	31042	13796	4714	12532	16890	6746	3732	6412		2005	9542	3924	5302
2006	48500	13335	24670	10495	35600	14628	5689	15283	21023	7004	7150	6869		2006	10754	4491	6529
2007	54849	15757	25901	13194	41813	16373	6800	18640	25429	8116	9789	7524		2007	11924	5240	7812
2008	68714	23501	29613	15600	52018	21124	9098	21796	32831	12451	12170	8210		2008	14527	6461.86	9994
2009	77400	25700	31100	20600	70900	24220.6	12400	34279	41197	13864	14180	13153		2009	15975.2	8742.29	12188.5
2010	95200	28300	35000	31900	85200	28200	18500	38500	48085	15430	16381	16274		2010	19428.6	10402.9	14010.4
2011	114991	32973	45118	36900	104660	30700	25747	48213	58697	18938	21160	18599		2011	20831.7	12029.9	16818.6
2012	124000	36942	45373	41685	122949	36600	31049	55300	70900	21682	27218	22000		2012	22262.1	14051.3	19972
2013	135731	41600	43618	50513	145220	40215	39008	65997	83722	24815	33242	25665		2013	24065.8	16502.3	23127.6
2014	121805	44386	31910	45510	155335	42531	33187	79617	83263	26468	31793	28788		2014	21444.5	17651.7	23000.8
2015	134564	46826	23610	64128	151398	44924	15869	90605	91138	26416	24700	40022		2015	23607.7	17011	24969.3
2016	147459	50810	26004	70645	156657	47907	12652	96098	97977	30105	24092	43780		2016	25645	17503.6	26552
2017	152742	60000	21042	71700	168622	51400	12222	105000	88115	31992	11717	44406		2017	26380.3	18777.5	23560.2
2018	158600	77898	26615	54087	166000	50600	12500	102900	101626	42250	14717	52827		2018	27250.9	18383.2	27028.2

## Sheet: people
Population				The population density
	Maqu	Xiahe	Luqu	Maqu	Xiahe	Luqu
1980	2.5	11.16	2.19	2.33623	11.584	4.53886
1981	2.49	11.34	2.21	2.32689	11.7708	4.58031
1982	2.56	12.16	2.25	2.3923	12.622	4.66321
1983	2.58	12.26	2.31	2.41099	12.7258	4.78756
1984	2.66	12.51	2.37	2.48575	12.9853	4.91192
1985	2.7	12.74	2.35	2.52313	13.224	4.87047
1986	2.71	12.93	2.4	2.53247	13.4212	4.97409
1987	2.79	13.01	2.41	2.60723	13.5043	4.99482
1988	2.84	13.18	2.43	2.65396	13.6807	5.03627
1989	2.87	13.38	2.54	2.68199	13.8883	5.26425
1990	3.03	13.75	2.58	2.83151	14.2724	5.34715
1991	3.06	13.93	2.71	2.85955	14.4592	5.61658
1992	3.09	14.11	2.73	2.88758	14.646	5.65803
1993	3.13	14.36	2.76	2.92496	14.9055	5.72021
1994	3.16	14.43	2.77	2.953	14.9782	5.74093
1995	3.44	15.13	2.79	3.21465	15.7048	5.78238
1996	3.58	15.05	2.83	3.34548	15.6218	5.86528
1997	3.62	15.28	2.88	3.38286	15.8605	5.96891
1998	3.68	7.69	2.94	3.43893	11.0425	6.09326
1999	3.71	7.78	2.98	3.46697	11.1717	6.17617
2000	3.78	7.72	2.97	3.53238	11.0856	6.15544
2001	4.01	7.68	3.07	3.74731	11.0281	6.36269
2002	4.06	7.73	3.11	3.79404	11.0999	6.4456
2003	4.07	7.85	3.13	3.80338	11.2723	6.48705
2004	4.29	7.91	3.17	4.00897	11.3584	6.56995
2005	4.48	7.91	3.2	4.18652	11.3584	6.63212
2006	4.51	7.93	3.24	4.21456	11.3871	6.71503
2007	4.6	7.98	3.27	4.29866	11.4589	6.7772
2008	4.73	8.05	3.3	4.42015	11.5594	6.83938
2009	4.845	8.11	3.38	4.52761	11.6456	7.00518
2010	4.9	8.19	3.4321	4.57901	11.7605	7.11316
2011	5.52	8.7	3.49	5.1584	12.4928	7.23316
2012	5.57	8.75	3.55	5.20512	12.5646	7.35751
2013	5.64	8.8	3.62	5.27054	12.6364	7.50259
2014	5.68	8.8	3.62	5.30792	12.6364	7.50259
2015	5.7	8.9	3.65	5.3266	12.78	7.56477
2016	5.75	8.95	3.69	5.37333	12.8518	7.64767
2017	5.79	8.98	3.74	5.41071	12.8949	7.7513
2018	5.82	9.03	3.76	5.43874	12.9667	7.79275

## Sheet: education
	2000			2010			2020
	Maqu	Xiahe	Luqu	Maqu	Xiahe	Luqu	Maqu	Xiahe	Luqu
Primary school education	12609	30044	10863	25344	47013	15820	24458	44422	16133
Junior middle school education	3359	6474	2152	5296	8829	3683	7432	10545	4285
High school education	2504	4003	1848	2615	4865	2334	3470	4359	2570
University education	676	1290	700	2324	4902	2514	6463	7618	5233
Other
	Maqu County			Xiahe County			Luqu County
	2000	2010	2020	2000	2010	2020	2000	2010	2020
Primary school education (%)	33.3571	51.7224	42.8336	38.9171	57.4029	51.4144	36.5758	46.1224	44.9387
Junior middle school education (%)	8.88624	10.8082	13.0158	8.38601	10.7802	12.2049	7.24579	10.7376	11.9359
High school education (%)	6.62434	5.33673	6.07706	5.18523	5.94017	5.04514	6.22222	6.80466	7.15877
University education (%)	1.78836	4.74286	11.3187	1.67098	5.98535	8.81713	2.3569	7.32945	14.5766
Other(%)	49.3439	27.3898	26.7548	45.8407	19.8913	22.5185	47.5993	29.0058	21.39
